# Supplementary material
Source: PubMed Central journal article supplement (PMC5096956)
Supplement: NIHMS804618-supplement-FINAL_PRODUCTION_FILE__SDC_1.pdf [file NIHMS804618-supplement-FINAL_PRODUCTION_FILE__SDC_1.pdf]

## Online Supplemental Results

Lower limits of detection for the multiplexing assay were as follows: IL-1 $\beta$ =0.21 pg/mL, IL-6=1.28 pg/mL, TNF- $\alpha$ =1.79 pg/mL, IL-2=0.49 pg/mL, IL-4=0.24 pg/mL, IL-5=0.54 pg/mL, IL-13=1.89 pg/mL, IL-10=0.63 pg/mL, IFN- $\gamma$ =4.22 pg/mL. The percentage of below detection samples were as follows: PMA/INO IL-2=0%, PMA/INO IL-4=0%, PMA IL-5=0%, PMA/INO IL-13=0%, PMA/INO IL-10=0.7%, PMA/INO IFN- $\gamma$ =0%, LPS IL-1 $\beta$ =0%, LPS IL-6=0%, LPS TNF- $\alpha$ =0%, ODN IL-1 $\beta$ =4.9%, ODN IL-6=0%, ODN TNF- $\alpha$ =0%, CR IL-2=0.68%, CR IL-4=6.8%, CR IL-5=0.68%, CR IL-13=10.2%, CR IL-10=0%, CR IFN- $\gamma$ =0.68%, DM IL-2=1.37%, DM IL-4=7.53%, DM IL-5=2.74%, DM IL-13=0.68%, DM IL-10=0.68%, DM IFN- $\gamma$ =0.68%, PMA/INO+Cort IL-2=0%, PMA/INO+Cort IL-4=0%, PMA/INO+Cort IL-5=0%, PMA/INO+Cort IL-13=0%, PMA/INO+Cort IL-10=0.72%, PMA/INO+Cort IFN- $\gamma$ =0%.

Below are regression tables for SES with individual cytokine values.

|                         | Prestige SES | Resource SES |
|-------------------------|--------------|--------------|
|                         | $\beta$      | $\beta$      |
| Nonspecific stimulation |              |              |
| PMA/INO: Th-1           |              |              |
| IFN- $\gamma$           | -.052        | -.150+       |
| IL-10                   | -.054        | -.189*       |
| PMA/INO: Th-2           |              |              |
| IL-2                    | -.066        | -.154+       |
| IL-4                    | -.059        | -.191*       |
| IL-5                    | -.001        | -.135        |
| IL-13                   | -.071        | -.199*       |

|                             |        |        |
|-----------------------------|--------|--------|
| Innate immune stimulation   |        |        |
| LPS: pro-inflammatory       |        |        |
| IL-1 $\beta$                | -.054  | .113   |
| IL-6                        | -.041  | .086   |
| TNF- $\alpha$               | -.038  | .041   |
| ODN: pro-inflammatory       |        |        |
| IL-1 $\beta$                | -.132  | -.142  |
| IL-6                        | -.117  | -.227* |
| TNF- $\alpha$               | -.202* | -.218* |
| Adaptive immune stimulation |        |        |
| Cockroach: Th-1             |        |        |
| IFN- $\gamma$               | .014   | -.069  |
| IL-10                       | .031   | -.100  |
| Cockroach: Th-2             |        |        |
| IL-2                        | .046   | .003   |
| IL-4                        | .037   | .106   |
| IL-5                        | -.050  | .027   |
| IL-13                       | -.002  | -.061  |
| Dustmite: Th-1              |        |        |
| IFN- $\gamma$               | -.004  | -.069  |
| IL-10                       | .062   | .112   |
| Dustmite: Th-2              |        |        |
| IL-2                        | .125   | .023   |
| IL-4                        | .082   | .130   |
| IL-5                        | .030   | .055   |
| IL-13                       | .040   | -.010  |
| Glucocorticoid sensitivity  |        |        |
| PMA/INO + Cort: Th-1        |        |        |
| IFN- $\gamma$               | .043   | -.135  |
| IL-10                       | -.022  | -.225* |
| PMA/INO + Cort: Th-2        |        |        |
| IL-2                        | -.026  | -.087  |
| IL-4                        | .011   | -.220* |
| IL-5                        | .048   | -.165+ |
| IL-13                       | -.005  | -.209* |

---

Note: +p<.10. \*p<.05. All analyses control for child age, gender, ethnicity, use of beta agonists, and use of inhaled corticosteroids.
